# Supplementary material for: Bee-mediated delivery of bacteriophage for biocontrol of the cherry canker pathogen Pseudomonas syringae pv. syringae
Source: Research Square preprint supplement (doi:10.21203/rs.3.rs-7053094/v1), 2025-07-14
Supplement: Supplementary file 1 [file e11134664bae98beb6c48d10.docx]

**Supplementary information**


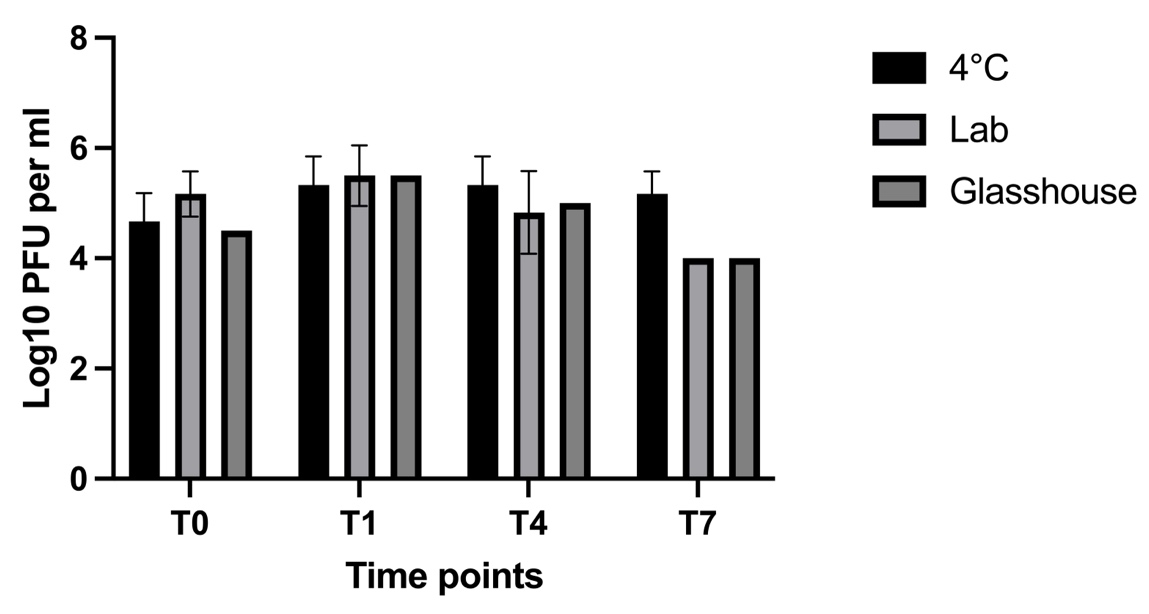


**Figure S1. Detection and titre of phage in artificial bee feed (*n*=6) at T0** **(immediately after inoculation), T1 (1-day post-inoculation),** **T4 (4 -day post-inoculation), and T7 (7-day post-inoculation),** **under 4oC, lab and glasshouse conditions (20±2oC)** **after spiking with phage powder.** Bars show the median PFU ml-1 and error bars represent the interquartile range.
